# Supplementary material for: Phosphorus-Containing Polymers as Sensitive Biocompatible Probes for 31P Magnetic Resonance
Source: Molecules. 2023 Mar 2;28(5):2334. doi: 10.3390/molecules28052334 (PMC10005191; doi:10.3390/molecules28052334)
Supplement: Supplementary file 1 [file molecules-28-02334-s001.zip › molecules-2103570-supplementary.pdf]

Supplementary Materials

# Phosphorus-Containing Polymers as Sensitive Biocompatible Probes for $^{31}\text{P}$ Magnetic Resonance

Lucie Kracíková <sup>1,2</sup>, Ladislav Androvič <sup>1</sup>, Iveta Potočková <sup>1</sup>, Natalia Ziolkowska <sup>3</sup>, Martin Vít <sup>3,4</sup>, David Červený <sup>3,4</sup>, Daniel Jiráček <sup>3,4,5</sup> and Richard Laga <sup>1,\*</sup>

<sup>1</sup> Institute of Macromolecular Chemistry, Czech Academy of Sciences, Heyrovského nám. 2, 162 06 Prague, Czech Republic

<sup>2</sup> Department of Polymers, Faculty of Chemical Technology, University of Chemistry and Technology, Technická 5, 166 28 Prague, Czech Republic

<sup>3</sup> Institute for Clinical and Experimental Medicine, Vídeňská 1958/9, 140 21 Prague, Czech Republic

<sup>4</sup> Institute of Biophysics and Informatics, First Faculty of Medicine, Charles University, 121 08 Prague, Czech Republic

<sup>5</sup> Faculty of Health Studies, Technical University of Liberec, Studentská 1402/2, 461 17 Liberec, Czech Republic

\* Correspondence: laga@imc.cas.cz; Fax: +420-296-809-410

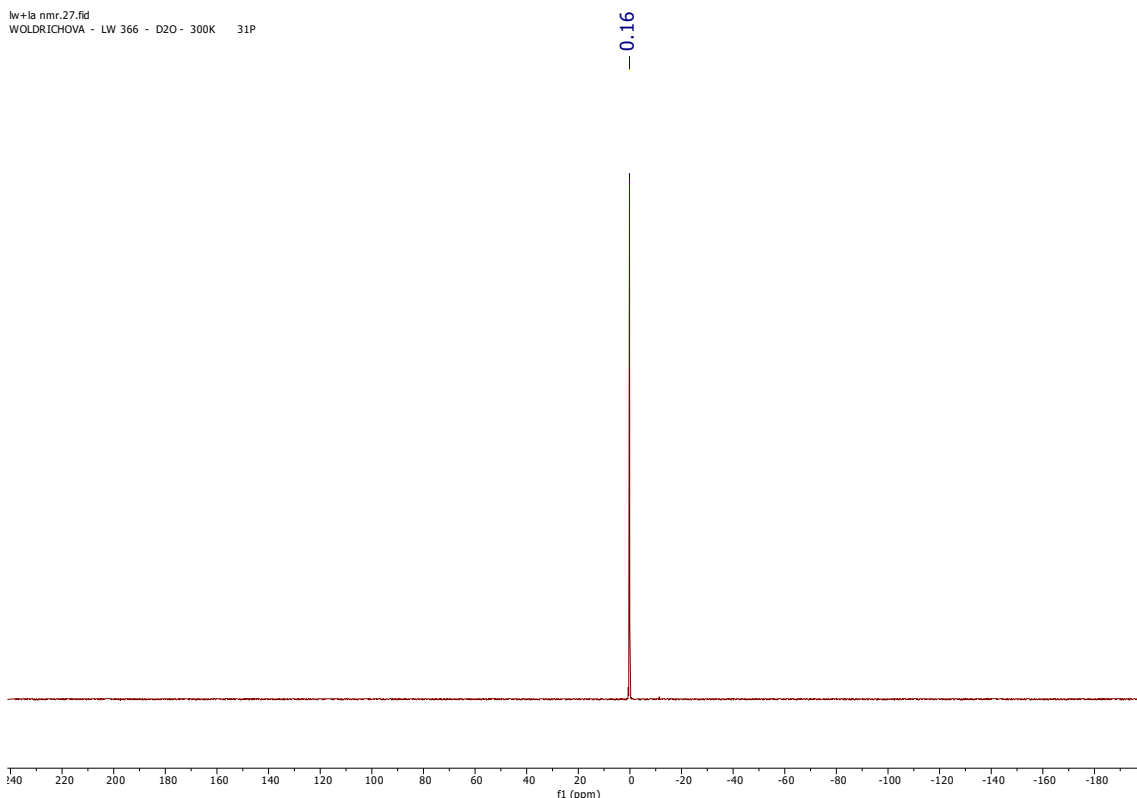

**Figure S1.**  $^{31}\text{P}$  NMR spectrum of polymer (2a) in  $\text{D}_2\text{O}$ .

NMR/LW\_147\_PAMAM  
LW147\_PAMAM\_redeno\_31P

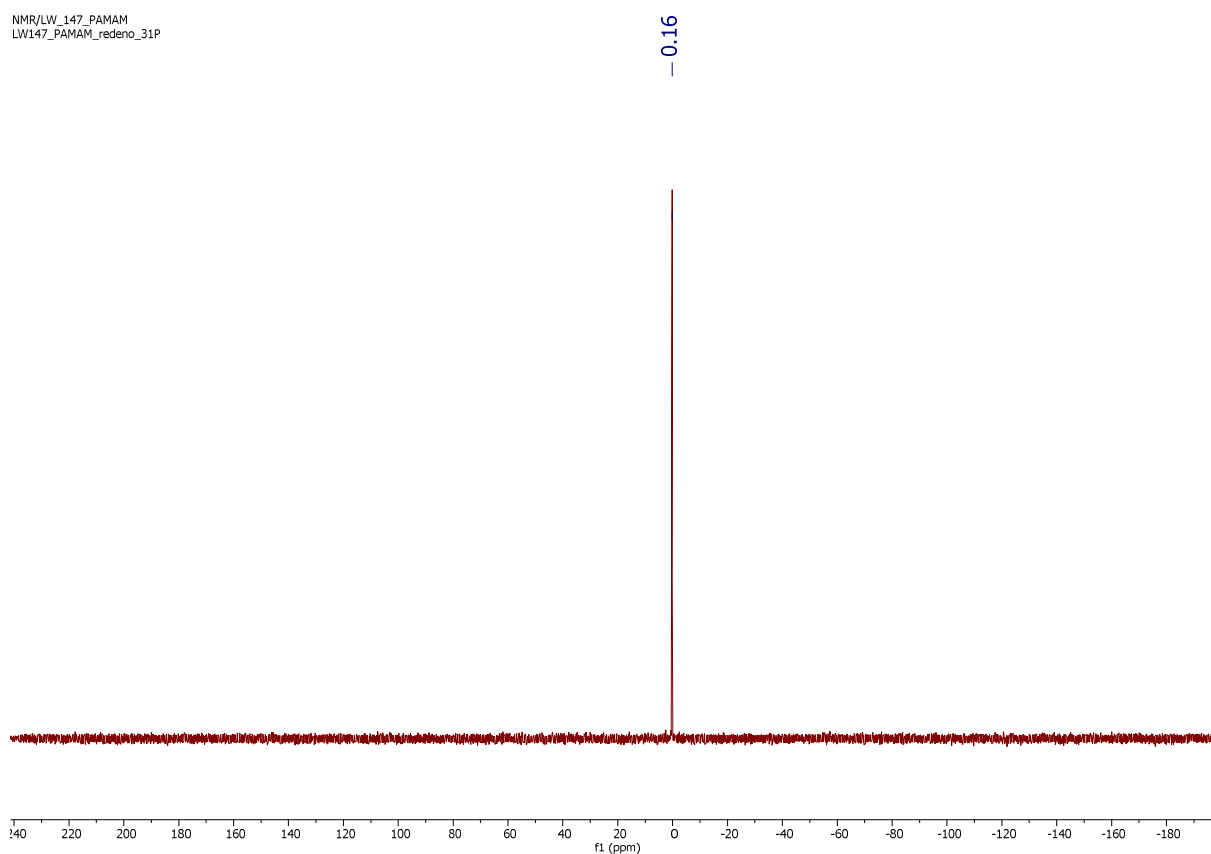

Figure S2.  $^{31}\text{P}$  NMR spectrum of polymer (2b) in  $\text{D}_2\text{O}$ .

NMR/LW\_157\_CTP  
LW157\_CTP\_redeno\_31P

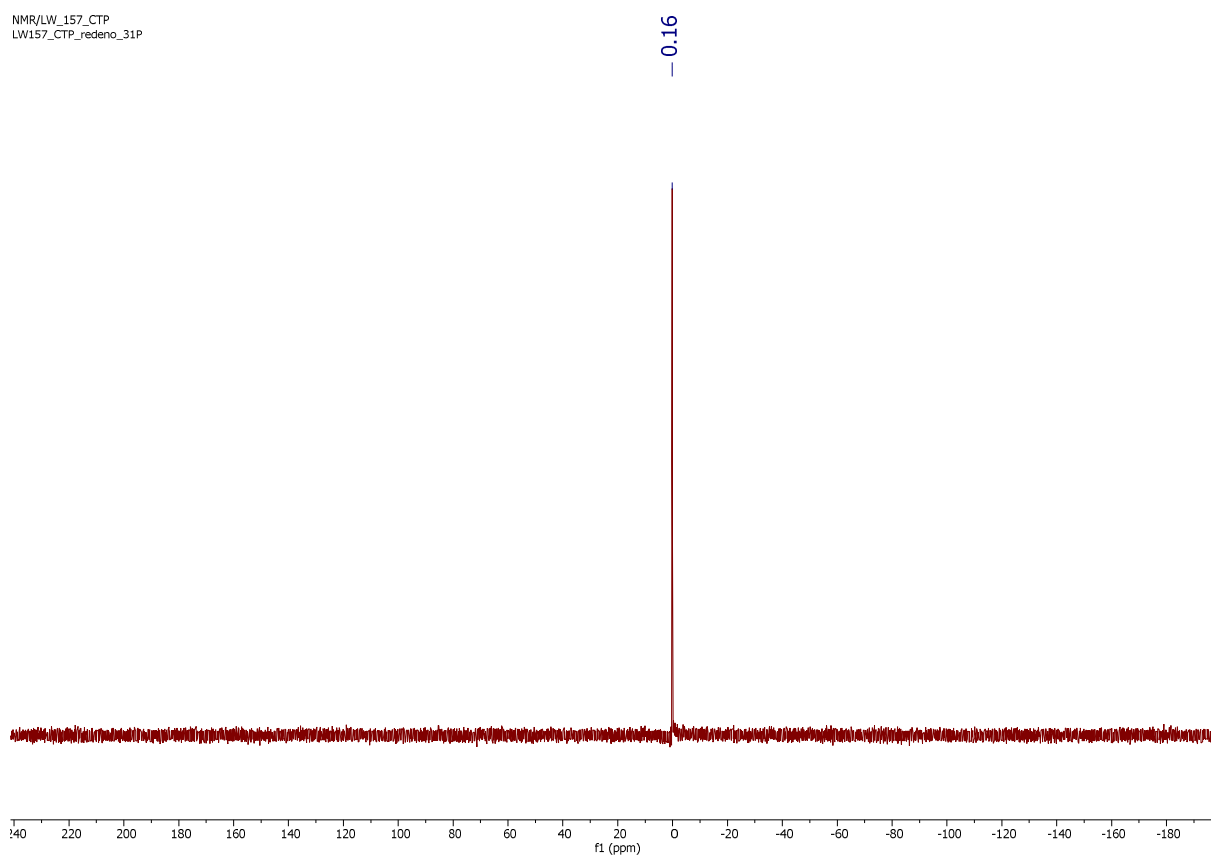

Figure S3.  $^{31}\text{P}$  NMR spectrum of polymer (2c) in  $\text{D}_2\text{O}$ .

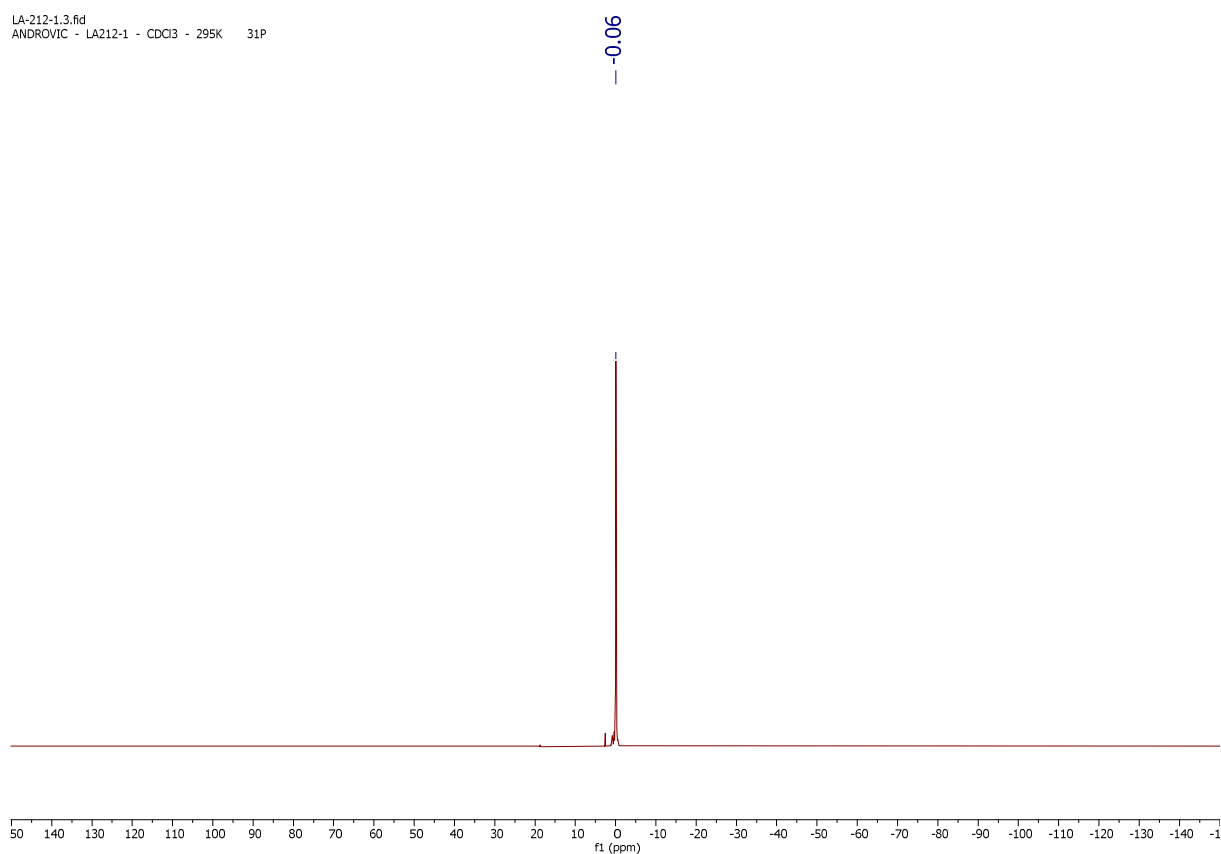

**Figure S4.** <sup>31</sup>P NMR spectrum of polymer (2d) in D<sub>2</sub>O.

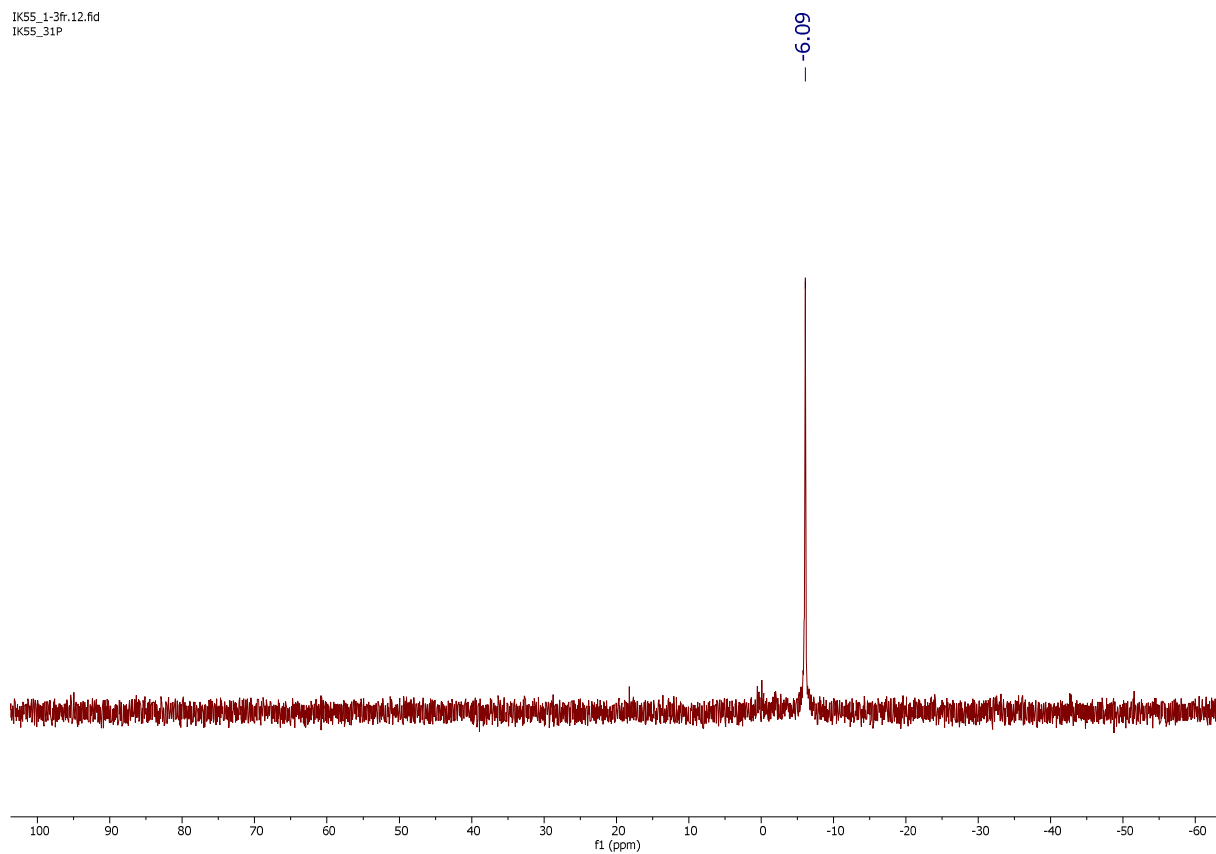

**Figure S5.** <sup>31</sup>P NMR spectrum of polymer (2e) in D<sub>2</sub>O.

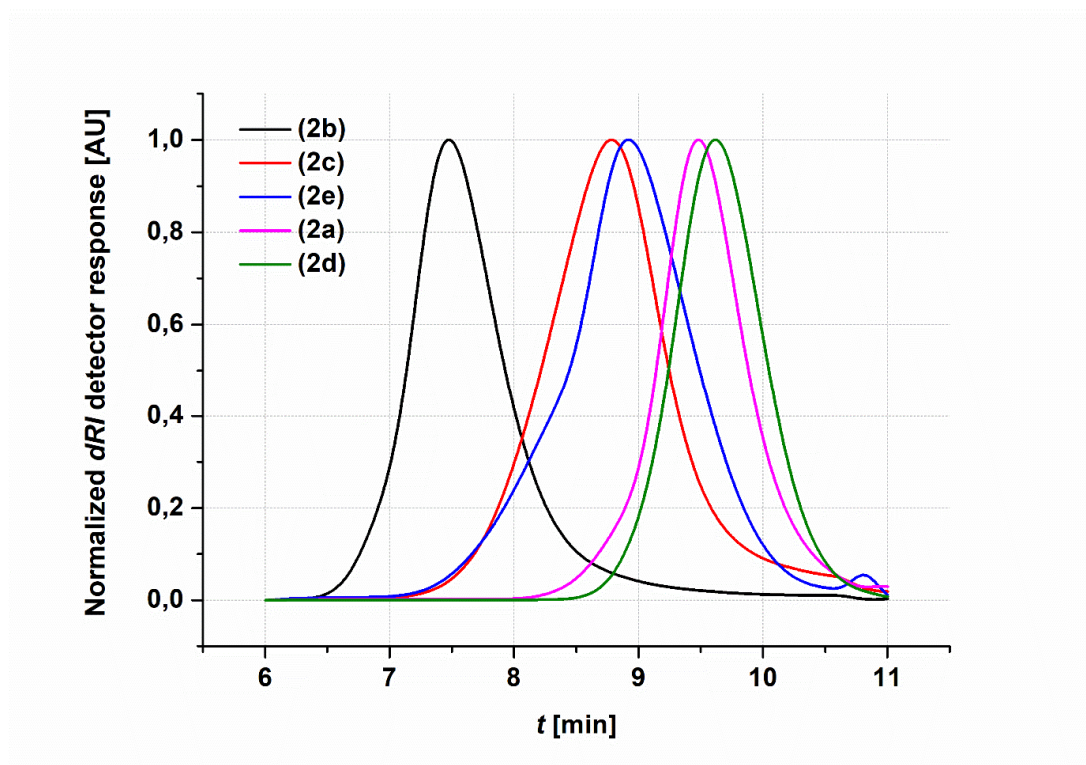

**Figure S6.** SEC profiles of  $^{31}\text{P}$ -MR probes: (2a) IBN-PMPC-Pg, (2b) PAMAM-g-PMPC-Pg, (2c) CTP-g-PMPC-Pg, (2d) PEEP-Pg and (2e) PMEEEP-Vi.

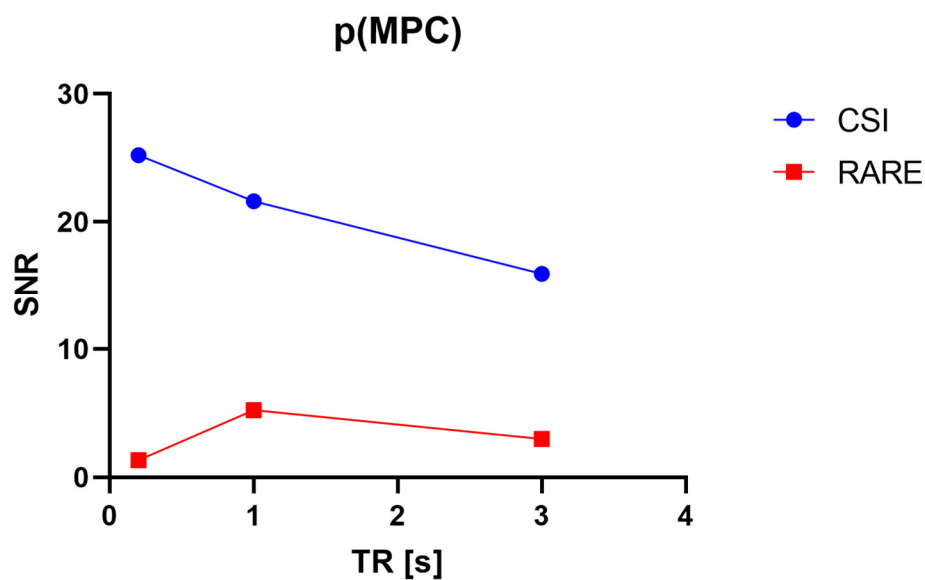

**Figure S7.** Comparison of the sensitivities of  $^{31}\text{P}$  MR measurements of PMPC polymer probe using  $^{31}\text{P}$  CSI (blue line) and  $^{31}\text{P}$  RARE sequences (red line), at constant measurement time with varying TR.

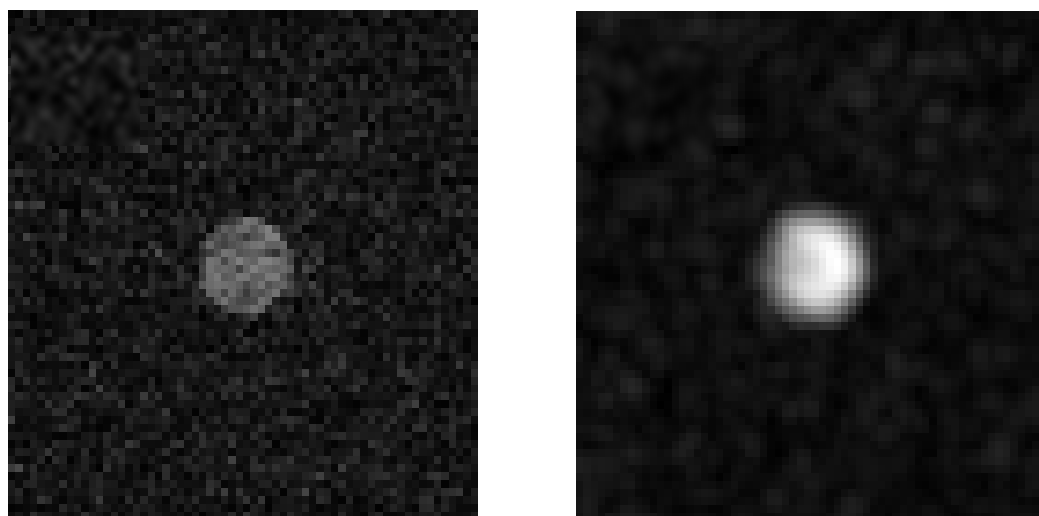

**Figure S8.** Comparison of the sensitivities of  $^{31}\text{P}$  MRI/MRSI measurements of PMPC polymer probe using  $^{31}\text{P}$  RARE (A) and  $^{31}\text{P}$  CSI (B) sequences. Images were acquired with the same repetition time (TR) and geometry/resolution (TR = 1s, FOV = 4 x 4 cm, slice thickness = 1 cm); No post-process filtration was performed.
